# Supplementary material
Source: PubMed Central journal article supplement (PMC6584889)
Supplement: jamadermatol-155-1291-s001.pdf [file jamadermatol-155-1291-s001.pdf]

## Supplementary Online Content

Dick V, Sinz C, Mittlböck M, Kittler H, Tschandl P. Accuracy of computer-aided diagnosis of melanoma: a meta-analysis. *JAMA Dermatol*. Published online June 19, 2019. doi:10.1001/jamadermatol.2019.1375

**eTable 1.** General Characteristics of All Included Studies (n=132)

**eTable 2.** Assessment of Bias Risk and Applicability Concerns of the Included Studies (n=132) Using the QUADAS-2 Tool

**eTable 3.** Sensitivity, Specificity and Covariable Effects Calculated With Two Identified Outliers (Wolf 2013 and Jiji 2017) Excluded

**eFigure.** Risk of Bias, Applicability Concerns, and Methodologic Quality

**eReferences.**

This supplementary material has been provided by the authors to give readers additional information about their work.

**eTable 1: General characteristics of all included studies (n=132)**

NMLs = non-melanocytic lesions, nr= not reported, SVM= support vector machine, ANN= artificial neural network, \*histopathology was only used for suspicious lesions

| STUDY ID                        | METHOD          | TEST SET SOURCE | TOTAL DATA SET SIZE | # OF MELANOMA | NMLS INCLUDED | CLASSIFIER            | INDEPENDENT TEST SET | GOLD STANDARD FOR THE TEST SET                                    | INCLUDED IN QUANTITATIVE ANALYSIS |
|---------------------------------|-----------------|-----------------|---------------------|---------------|---------------|-----------------------|----------------------|-------------------------------------------------------------------|-----------------------------------|
| ABUZAGHLEH 2015 <sup>1</sup>    | computer vision | public          | 200                 | 40            | no            | SVM                   | no                   | histopathology*, dermatoscopy                                     |                                   |
| AFIFI 2017 <sup>2</sup>         | computer vision | public          | 356                 | 168           | nr            | SVM                   | no                   | nr                                                                |                                   |
| AMOABEDINI 2018 <sup>3</sup>    | computer vision | public          | 76                  | 38            | no            | threshold             | no                   | nr                                                                | Yes                               |
| ASCIERTO 2010 <sup>4</sup>      | hardware-based  | proprietary     | 54                  | 12            | no            | nr                    | yes                  | histopathology                                                    | Yes                               |
| BARATA 2015A <sup>5</sup>       | computer vision | public          | 482                 | 241           | nr            | ensemble classifier   | no                   | expert consensus                                                  |                                   |
| BARATA 2015B <sup>6</sup>       | computer vision | public          | 200                 | 40            | no            | random forests        | no                   | histopathology*, dermatoscopy                                     | Yes                               |
| BARROS MENDES 2018 <sup>7</sup> | deep learning   | public          | 5286                | 374           | yes           | ANN                   | no                   | nr                                                                |                                   |
| BARZEGARI 2005 <sup>8</sup>     | computer vision | proprietary     | 122                 | 6             | yes           | ANN                   | no                   | histopathology                                                    | Yes                               |
| BAUR 2018 <sup>9</sup>          | deep learning   | public          | 2000                | 2000          | yes           | ANN                   | no                   | histopathology*, expert consensus                                 |                                   |
| BHATTACHARYA 2017 <sup>10</sup> | deep learning   | public          | 275                 | 128           | no            | SVM                   | no                   | nr                                                                |                                   |
| BI 2017 <sup>11</sup>           | deep learning   | public          | 4350                | nr            | nr            | ANN                   | yes                  | histopathology*, expert consensus                                 | Yes                               |
| BISSOTO 2018 <sup>12</sup>      | deep learning   | public          | nr                  | nr            | yes           | ANN                   | yes                  | nr                                                                |                                   |
| BONO 2002 <sup>13</sup>         | hardware-based  | proprietary     | 313                 | 66            | yes           | discriminant analysis | yes                  | histopathology                                                    |                                   |
| CARCAGNI 2018 <sup>14</sup>     | deep learning   | public          | 10015               | 1113          | yes           | ANN                   | yes                  | histopathology*, follow-up, confocal microscopy, expert consensus |                                   |
| CELEBI 2007 <sup>15</sup>       | computer vision | public          | 596                 | 88            | yes           | SVM                   | no                   | histopathology*, follow-up                                        |                                   |
| CELEBI 2008 <sup>16</sup>       | computer vision | public          | 545                 | 186           | yes           | decision tree         | no                   | histopathology*, follow-up                                        |                                   |
| CHAKRAVATI 2015 <sup>17</sup>   | computer vision | public          | 456                 | 251           | nr            | ANN                   | no                   | histopathology*, clinical evaluation                              |                                   |

|                                      |                 |             |        |     |     |                |     |                                                                    |     |
|--------------------------------------|-----------------|-------------|--------|-----|-----|----------------|-----|--------------------------------------------------------------------|-----|
| <b>CHANG H 2017<sup>18</sup></b>     | deep learning   | public      | 2750   | 521 | yes | ANN            | yes | histopathology*, expert consensus                                  | Yes |
| <b>CHANG WY 2013<sup>19</sup></b>    | computer vision | proprietary | 769    | 8   | yes | SVM            | no  | histopathology                                                     |     |
| <b>CHANG WY 2015<sup>20</sup></b>    | computer vision | proprietary | 347    | 7   | yes | SVM            | yes | histopathology                                                     |     |
| <b>CHOU 2017<sup>21</sup></b>        | deep learning   | public      | 200    | 40  | no  | SVM            | no  | histopathology*, dermatoscopy                                      |     |
| <b>CODELLA 2016<sup>22</sup></b>     | deep learning   | public      | 1279   | 248 | no  | SVM            | yes | histopathology*, expert consensus, nr for part of the lesions      | Yes |
| <b>CODELLA 2018<sup>23</sup></b>     | deep learning   | public      | 2750   | 521 | yes | kNN            | no  | histopathology*, expert consensus                                  |     |
| <b>DEL ROSARIO 2018<sup>24</sup></b> | computer vision | proprietary | 1076   | 71  | yes | threshold      | yes | histopathology                                                     | Yes |
| <b>DING 2015<sup>25</sup></b>        | hardware-based  | proprietary | 46     | 12  | yes | SVM            | no  | nr                                                                 | Yes |
| <b>DO 2014<sup>26</sup></b>          | computer vision | proprietary | 81     | 29  | nr  | SVM            | no  | nr                                                                 |     |
| <b>DO 2017<sup>27</sup></b>          | computer vision | proprietary | 184    | 67  | no  | SVM            | no  | histopathology*, expert consensus                                  | Yes |
| <b>DREISEITL 2009<sup>28</sup></b>   | computer vision | proprietary | 3827   | 31  | no  | ANN            | yes | histopathology*, follow-up                                         | Yes |
| <b>ESTEVA 2017<sup>29</sup></b>      | deep learning   | proprietary | 129450 | nr  | yes | ANN            | no  | test set histopathology, rest unspecified (dermatologist-labelled) |     |
| <b>FERRI 2010<sup>30</sup></b>       | computer vision | proprietary | 977    | 50  | no  | SVM            | no  | histopathology*, follow-up                                         | Yes |
| <b>FINK 2016<sup>31</sup></b>        | hardware-based  | proprietary | 360    | 3   | no  | threshold      | yes | histopathology*, dermoscopy follow-up                              | Yes |
| <b>FORNACIALI 2016<sup>32</sup></b>  | deep learning   | public      | 1052   | 267 | nr  | SVM            | no  | histopathology*, clinical evaluation                               |     |
| <b>FORSCHNER 2018<sup>33</sup></b>   | hardware-based  | proprietary | 529    | 101 | yes | ANN            | no  | histopathology                                                     | Yes |
| <b>FRIEDMAN 2008<sup>34</sup></b>    | hardware-based  | proprietary | 99     | 49  | no  | threshold      | no  | histopathology                                                     |     |
| <b>GAREAU 2017<sup>35</sup></b>      | computer vision | proprietary | 120    | 60  | no  | decision tree  | no  | histopathology                                                     | Yes |
| <b>GARNAVI 2012<sup>36</sup></b>     | computer vision | proprietary | 289    | 114 | nr  | random forests | no  | nr                                                                 | Yes |
| <b>GAUTAM 2018<sup>37</sup></b>      | computer vision | public      | 294    | 138 | nr  | random forests | no  | nr                                                                 | Yes |

|                                                |                 |             |         |      |     |                     |     |                                                                   |     |
|------------------------------------------------|-----------------|-------------|---------|------|-----|---------------------|-----|-------------------------------------------------------------------|-----|
| <b>GILMORE 2009</b> <sup>38</sup>              | computer vision | proprietary | 312     | 102  | no  | nr                  | no  | histopathology*, dermatoscopy                                     |     |
| <b>GILMORE 2010</b> <sup>39</sup>              | computer vision | proprietary | 199     | 101  | no  | SVM                 | no  | histopathology                                                    | Yes |
| <b>GILMORE 2018</b> <sup>40</sup>              | computer vision | proprietary | 250     | 85   | no  | SVM                 | no  | histopathology*, dermoscopy evaluation                            |     |
| <b>GONZALEZ DIAZ 2017</b> <sup>41</sup>        | deep learning   | public      | 2750    | 521  | yes | ANN                 | yes | histopathology*, expert consensus                                 | Yes |
| <b>GOYAL 2018</b> <sup>42</sup>                | deep learning   | public      | 10015   | 1113 | yes | ANN                 | yes | histopathology*, follow-up, confocal microscopy, expert consensus |     |
| <b>GUO S 2017</b> <sup>43</sup>                | deep learning   | public      | 2750    | 521  | yes | ensemble classifier | yes | histopathology*, expert consensus                                 | Yes |
| <b>GUO Y 2018</b> <sup>44</sup>                | deep learning   | public      | 10015   | 1113 | yes | ANN                 | yes | histopathology*, follow-up, confocal microscopy, expert consensus |     |
| <b>HAENSLE 2018</b> <sup>45</sup>              | deep learning   | proprietary | >100000 | nr   | no  | ANN                 | no  | histopathology*, dermoscopy follow-up                             | Yes |
| <b>HAIDER 2014</b> <sup>46</sup>               | computer vision | public      | 206     | 119  | nr  | bayesian            | no  | histopathology                                                    | Yes |
| <b>HARANGI 2017</b> <sup>47</sup>              | deep learning   | public      | 2750    | 521  | yes | ANN                 | yes | histopathology*, expert consensus                                 | Yes |
| <b>HARANGI 2018</b> <sup>48</sup>              | deep learning   | public      | 2750    | 521  | yes | ensemble on ANNs    | no  | histopathology*, expert consensus                                 |     |
| <b>HARDIE 2018</b> <sup>49</sup>               | computer vision | public      | 10015   | 1113 | yes | SVM                 | no  | histopathology*, follow-up, confocal microscopy, expert consensus | Yes |
| <b>HAR-SHAI 2005</b> <sup>50</sup>             | hardware-based  | proprietary | 449     | 69   | yes | threshold           | yes | histopathology                                                    | Yes |
| <b>HAUSCHILD 2014</b> <sup>51</sup>            | hardware-based  | proprietary | 130     | 65   | yes | threshold           | yes | histopathology                                                    |     |
| <b>HUNGER 2012</b> <sup>52</sup>               | hardware-based  | proprietary | 45      | 12   | no  | threshold           | yes | histopathology*, follow-up                                        |     |
| <b>JAWOREK-KORJAKOWSKA 2016A</b> <sup>53</sup> | computer vision | public      | 300     | 60   | no  | SVM                 | no  | histopathology                                                    | Yes |
| <b>JAWOREK-KORJAKOWSKA 2016B</b> <sup>54</sup> | computer vision | public      | 200     | 70   | nr  | SVM                 | no  | histopathology                                                    |     |
| <b>JIJI 2017</b> <sup>55</sup>                 | computer vision | public      | 2750    | 521  | yes | SVM                 | yes | histopathology*, expert consensus                                 | Yes |
| <b>KAUR 2015</b> <sup>56</sup>                 | computer vision | proprietary | 192     | 114  | no  | linear regression   | no  | histopathology*, follow-up                                        |     |

|                                        |                 |             |       |      |     |                           |     |                                                                               |     |
|----------------------------------------|-----------------|-------------|-------|------|-----|---------------------------|-----|-------------------------------------------------------------------------------|-----|
| <b>KAWAHARA 2018<sup>57</sup></b>      | deep learning   | proprietary | 1011  | 252  | yes | ANN                       | no  | nr                                                                            | Yes |
| <b>KHAN 2018<sup>58</sup></b>          | computer vision | public      | 4752  | 1057 | yes | SVM                       | no  | histopathology*, follow-up, expert consensus, unknown for part of the lesions | Yes |
| <b>KITADA 2018<sup>59</sup></b>        | deep learning   | public      | 10015 | 1113 | yes | ANN                       | yes | histopathology*, follow-up, confocal microscopy, expert consensus             |     |
| <b>KOSTOPOULOS 2017<sup>60</sup></b>   | computer vision | public      | 399   | 69   | no  | ANN                       | no  | nr                                                                            | Yes |
| <b>LAI 2018<sup>61</sup></b>           | deep learning   | public      | 2000  | 374  | yes | ANN                       | no  | histopathology*, expert consensus                                             |     |
| <b>LEE 2018<sup>62</sup></b>           | deep learning   | public      | 10015 | 1113 | yes | ANN                       | yes | histopathology*, follow-up, confocal microscopy, expert consensus             |     |
| <b>LI K 2018<sup>63</sup></b>          | deep learning   | public      | 10015 | 1113 | yes | ANN                       | no  | histopathology*, follow-up, confocal microscopy, expert consensus             | Yes |
| <b>LI L 2014<sup>64</sup></b>          | hardware-based  | public      | 187   | 19   | no  | bayesian                  | no  | histopathology                                                                |     |
| <b>LI Y 2017<sup>65</sup></b>          | deep learning   | public      | 2750  | 521  | yes | ANN                       | yes | histopathology*, expert consensus                                             | Yes |
| <b>LINGALA 2014<sup>66</sup></b>       | computer vision | proprietary | 888   | 195  | no  | logistic regression model | no  | nr                                                                            |     |
| <b>LIU 2015<sup>67</sup></b>           | computer vision | public      | 258   | 76   | yes | SVM                       | no  | histopathology*, clinical evaluation                                          | Yes |
| <b>LU 2018<sup>68</sup></b>            | deep learning   | public      | 10015 | 1113 | yes | ANN                       | no  | histopathology*, follow-up, confocal microscopy, expert consensus             |     |
| <b>MAGLIOGIANNIS 2004<sup>69</sup></b> | computer vision | proprietary | 17    | 7    | no  | SVM                       | no  | histopathology                                                                |     |
| <b>MAGLIOGIANNIS 2015<sup>70</sup></b> | computer vision | proprietary | 208   | 100  | no  | SVM                       | no  | histopathology                                                                | Yes |
| <b>MAHBOD 2017<sup>71</sup></b>        | deep learning   | public      | 2750  | 521  | yes | SVM                       | yes | histopathology*, expert consensus                                             | Yes |
| <b>MAITNER 2018<sup>72</sup></b>       | deep learning   | public      | 10015 | 1113 | yes | ANN                       | yes | histopathology*, follow-up, confocal microscopy, expert consensus             |     |
| <b>MALVEHY 2014<sup>73</sup></b>       | hardware-based  | proprietary | 2416  | 265  | yes | threshold                 | yes | histopathology                                                                | Yes |
| <b>MANOUSAKI 2006<sup>74</sup></b>     | computer vision | proprietary | 132   | 23   | no  | logistic regression model | no  | histopathology                                                                | Yes |
| <b>MARCHETTI 2018<sup>75</sup></b>     | deep learning   | public      | 379   | 75   | no  | threshold                 | no  | histopathology*, expert consensus                                             | Yes |
| <b>MARQUES 2012<sup>76</sup></b>       | computer vision | proprietary | 163   | 17   | no  | nr                        | no  | nr                                                                            | Yes |

|                                            |                 |             |       |      |     |                          |     |                                                                   |     |
|--------------------------------------------|-----------------|-------------|-------|------|-----|--------------------------|-----|-------------------------------------------------------------------|-----|
| <b>MATSUNAGA 2017<sup>77</sup></b>         | deep learning   | public      | 4194  | 930  | yes | ANN                      | yes | histopathology*, expert consensus                                 | Yes |
| <b>MENEGOLA 2016<sup>78</sup></b>          | deep learning   | public      | nr    | nr   | yes | SVM                      | no  | histopathology                                                    |     |
| <b>MENEGOLA 2017A<sup>79</sup></b>         | deep learning   | public      | nr    | nr   | yes | SVM                      | no  | histopathology*, expert consensus, nr for part of the lesions     | Yes |
| <b>MENEGOLA 2017B<sup>80</sup></b>         | deep learning   | public      | 18000 | nr   | yes | SVM                      | yes | nr                                                                | Yes |
| <b>MESSADI 2009<sup>81</sup></b>           | computer vision | proprietary | 180   | 72   | no  | ANN                      | no  | clinical evaluation                                               |     |
| <b>MIRUNALINI 2017<sup>82</sup></b>        | deep learning   | public      | 2750  | 521  | yes | ANN                      | yes | histopathology*, expert consensus                                 | Yes |
| <b>MOLLERSEN 2015<sup>83</sup></b>         | computer vision | proprietary | 877   | 45   | yes | nr                       | yes | histopathology                                                    | Yes |
| <b>MONHEIT 2011<sup>84</sup></b>           | hardware-based  | proprietary | 1632  | 127  | yes | threshold                | yes | histopathology                                                    |     |
| <b>MUNIA 2017<sup>85</sup></b>             | computer vision | public      | 170   | 70   | no  | SVM                      | no  | nr                                                                | Yes |
| <b>MURPHREE 2017<sup>86</sup></b>          | deep learning   | public      | 2750  | 521  | yes | ANN                      | yes | histopathology*, expert consensus                                 | Yes |
| <b>NADER VASCONCELOS 2017<sup>87</sup></b> | deep learning   | public      | 2750  | 521  | yes | ANN                      | yes | histopathology*, expert consensus                                 | Yes |
| <b>NANNI 2018<sup>88</sup></b>             | deep learning   | public      | 10015 | 1113 | yes | ANN                      | yes | histopathology*, follow-up, confocal microscopy, expert consensus |     |
| <b>NASIRI 2018<sup>89</sup></b>            | deep learning   | public      | 10015 | 1113 | yes | ANN                      | yes | histopathology*, follow-up, confocal microscopy, expert consensus |     |
| <b>NASR-ESFAHANI 2016<sup>90</sup></b>     | deep learning   | public      | 170   | 70   | no  | ANN                      | yes | nr                                                                |     |
| <b>NICOLAS 2014<sup>91</sup></b>           | computer vision | proprietary | 150   | nr   | yes | kNN                      | no  | histopathology                                                    |     |
| <b>PAL 2018<sup>92</sup></b>               | deep learning   | public      | 10015 | 1113 | yes | ANN                      | yes | histopathology*, follow-up, confocal microscopy, expert consensus |     |
| <b>PATWARDHAN 2005<sup>93</sup></b>        | hardware-based  | proprietary | 90    | 30   | no  | bell membership function | no  | histopathology                                                    | Yes |
| <b>PELLACANI 2004<sup>94</sup></b>         | computer vision | proprietary | 339   | 113  | no  | discriminant analysis    | no  | histopathology                                                    | Yes |
| <b>PEREZ 2018<sup>95</sup></b>             | deep learning   | public      | 2750  | 512  | yes | ANN                      | no  | histopathology*, expert consensus                                 |     |
| <b>PICCOLO 2014<sup>96</sup></b>           | computer vision | proprietary | 165   | 33   | no  | threshold                | no  | histopathology                                                    | Yes |

|                                          |                 |             |       |      |     |                                                       |     |                                                                                          |     |
|------------------------------------------|-----------------|-------------|-------|------|-----|-------------------------------------------------------|-----|------------------------------------------------------------------------------------------|-----|
| <b>POLAP 2018</b> <sup>97</sup>          | computer vision | public      | 200   | 40   | no  | ANN                                                   | no  | histopathology*, dermoscopy evaluation                                                   | Yes |
| <b>QUINZAN 2013</b> <sup>98</sup>        | hardware-based  | proprietary | 32    | 7    | no  | qualified majority voting with 5 SVMs                 | no  | histopathology                                                                           | Yes |
| <b>RADHAKRISHNAN 2017</b> <sup>99</sup>  | deep learning   | public      | 1279  | 248  | no  | ANN                                                   | no  | histopathology*, expert consensus, nr for part of the lesions                            | Yes |
| <b>RADHAKRISHNAN 2018</b> <sup>100</sup> | deep learning   | public      | 2750  | 512  | yes | ANN                                                   | no  | histopathology*, expert consensus                                                        |     |
| <b>RAMEZANI 2014</b> <sup>101</sup>      | computer vision | public      | 282   | 133  | nr  | SVM                                                   | no  | nr                                                                                       | Yes |
| <b>RAY 2018</b> <sup>102</sup>           | deep learning   | public      | 10015 | 1113 | yes | deep forest                                           | no  | histopathology*, follow-up, confocal microscopy, expert consensus                        |     |
| <b>REZVANTALAB 2018</b> <sup>103</sup>   | deep learning   | public      | 10135 | 1153 | yes | ANN                                                   | no  | histopathology*, follow-up, confocal microscopy, expert consensus, dermoscopy evaluation | Yes |
| <b>ROCHA 2017</b> <sup>104</sup>         | hardware-based  | proprietary | 160   | 6    | no  | threshold                                             | yes | histopathology*, follow-up                                                               | Yes |
| <b>RUBEGNI 2015</b> <sup>105</sup>       | computer vision | proprietary | 856   | 272  | no  | logistic regression model                             | no  | histopathology                                                                           | Yes |
| <b>RUIZ 2008</b> <sup>106</sup>          | computer vision | public      | 110   | nr   | nr  | voting system based on ANNs and a bayesian classifier | no  | nr                                                                                       |     |
| <b>SABBAGHI 2018</b> <sup>107</sup>      | computer vision | proprietary | 825   | 181  | no  | SVM                                                   | no  | histopathology*, dermoscopy follow-up                                                    |     |
| <b>SATHEESHA 2017</b> <sup>108</sup>     | computer vision | public      | 263   | nr   | no  | SVM                                                   | no  | nr                                                                                       |     |
| <b>SBONER 2003</b> <sup>109</sup>        | computer vision | proprietary | 152   | 42   | no  | ensemble classifier                                   | no  | histopathology                                                                           | Yes |
| <b>SHAIFIEE 2017</b> <sup>110</sup>      | deep learning   | public      | 9152  | 567  | yes | ANN                                                   | no  | histopathology                                                                           |     |
| <b>SITU 2008</b> <sup>111</sup>          | computer vision | proprietary | 100   | 30   | no  | SVM                                                   | no  | nr                                                                                       |     |
| <b>SITU 2010</b> <sup>112</sup>          | computer vision | proprietary | 100   | 30   | no  | SVM                                                   | no  | nr                                                                                       | Yes |
| <b>SITU 2011</b> <sup>113</sup>          | computer vision | public      | 360   | 90   | nr  | SVM                                                   | no  | histopathology                                                                           |     |
| <b>STANLEY 2007</b> <sup>114</sup>       | computer vision | public      | 226   | 113  | no  | threshold                                             | no  | histopathology                                                                           | Yes |
| <b>STOECKER 2005</b> <sup>115</sup>      | computer vision | proprietary | 512   | 165  | no  | ANN                                                   | no  | histopathology                                                                           |     |

|                                           |                 |             |       |      |     |                             |     |                                                                   |     |
|-------------------------------------------|-----------------|-------------|-------|------|-----|-----------------------------|-----|-------------------------------------------------------------------|-----|
| <b>SWANSON 2010</b> <sup>116</sup>        | computer vision | proprietary | 118   | 11   | yes | threshold                   | no  | histopathology                                                    | Yes |
| <b>TEIXEIRA SOUSA 2017</b> <sup>117</sup> | deep learning   | public      | 2750  | 521  | yes | ANN                         | yes | histopathology*, expert consensus                                 | Yes |
| <b>TENENHAUS 2010</b> <sup>118</sup>      | computer vision | proprietary | 227   | 32   | no  | partial least squares model | no  | histopathology*, clinical evaluation                              | Yes |
| <b>TOMATIS 2003</b> <sup>119</sup>        | hardware-based  | proprietary | 573   | 132  | yes | ANN                         | no  | histopathology                                                    |     |
| <b>TOMATIS 2005</b> <sup>120</sup>        | hardware-based  | proprietary | 2507  | 184  | yes | ANN                         | no  | histopathology*, clinical evaluation                              |     |
| <b>TSCHANDL 2018</b> <sup>121</sup>       | deep learning   | public      | 20329 | 3044 | yes | ANN                         | no  | histopathology*, expert consensus, nr for part of the lesions     | Yes |
| <b>VALLE 2017</b> <sup>122</sup>          | deep learning   | public      | 19931 | 2401 | yes | ANN                         | no  | nr                                                                |     |
| <b>WADHAWAN 2011</b> <sup>123</sup>       | computer vision | public      | 347   | 110  | nr  | SVM                         | no  | dermatoscopy                                                      | Yes |
| <b>WOLF 2013</b> <sup>124</sup>           | computer vision | proprietary | 188   | 60   | yes | nr                          | yes | histopathology                                                    | Yes |
| <b>WU 2018</b> <sup>125</sup>             | deep learning   | public      | 10015 | 1113 | yes | ANN                         | no  | histopathology*, follow-up, confocal microscopy, expert consensus |     |
| <b>YANG 2017</b> <sup>126</sup>           | deep learning   | public      | 2750  | 521  | yes | ANN                         | yes | histopathology*, expert consensus                                 | Yes |
| <b>YAP 2018</b> <sup>127</sup>            | deep learning   | proprietary | 2917  | 727  | yes | ANN                         | no  | histopathology                                                    | Yes |
| <b>YI 2018</b> <sup>128</sup>             | deep learning   | public      | 1479  | 288  | no  | ANN                         | no  | histopathology*, dermoscopy evaluation, expert consensus          |     |
| <b>YU C 2018</b> <sup>129</sup>           | deep learning   | proprietary | 724   | 350  | no  | ANN                         | no  | histopathology                                                    | Yes |
| <b>YU L 2017</b> <sup>130</sup>           | deep learning   | public      | 1279  | 248  | no  | ANN                         | no  | histopathology*, expert consensus, nr for part of the lesions     | Yes |
| <b>ZEKOVIC 2014</b> <sup>131</sup>        | hardware-based  | proprietary | 48    | 11   | yes | partial least squares model | no  | histopathology                                                    |     |
| <b>ZHOU 2011</b> <sup>132</sup>           | hardware-based  | proprietary | 76    | 23   | nr  | ensemble classifier         | no  | nr                                                                |     |



**eTable 2: Assessment of bias risk (br) and applicability concerns (ap) of the included studies (n=132) using the QUADAS-2 tool.**

| STUDY ID                        | SAMPLE SELECTION (BR) | INDEX TEST (BR) | REFERENCE STANDARD (BR) | FLOW AND TIMING (BR) | SAMPLE SELECTION (AP) | INDEX TEST (AP) | REFERENCE STANDARD (AP) |
|---------------------------------|-----------------------|-----------------|-------------------------|----------------------|-----------------------|-----------------|-------------------------|
| ABUZAGHLEH 2015 <sup>1</sup>    | high                  | high            | low                     | low                  | low                   | low             | low                     |
| AFIFI 2017 <sup>2</sup>         | high                  | high            | moderate                | high                 | low                   | low             | low                     |
| AMOABEDINI 2018 <sup>3</sup>    | high                  | high            | moderate                | high                 | low                   | low             | low                     |
| ASCIERTO 2010 <sup>4</sup>      | low                   | low             | low                     | low                  | low                   | low             | low                     |
| BARATA 2015A <sup>5</sup>       | high                  | high            | low                     | low                  | low                   | low             | low                     |
| BARATA 2015B <sup>6</sup>       | high                  | high            | low                     | low                  | low                   | low             | low                     |
| BARROS MENDES 2018 <sup>7</sup> | high                  | high            | moderate                | high                 | low                   | low             | low                     |
| BARZEGARI 2005 <sup>8</sup>     | low                   | high            | low                     | low                  | low                   | low             | low                     |
| BAUR 2018 <sup>9</sup>          | high                  | high            | low                     | low                  | low                   | low             | low                     |
| BHATTACHARYA 2017 <sup>10</sup> | high                  | high            | moderate                | moderate             | low                   | low             | low                     |
| BI 2017 <sup>11</sup>           | high                  | low             | moderate                | low                  | low                   | low             | low                     |
| BISSOTO 2018 <sup>12</sup>      | high                  | low             | moderate                | low                  | moderate              | moderate        | low                     |
| BONO 2002 <sup>13</sup>         | high                  | low             | low                     | low                  | moderate              | moderate        | low                     |
| CARCAGNI 2018 <sup>14</sup>     | high                  | low             | low                     | low                  | moderate              | moderate        | low                     |
| CELEBI 2007 <sup>15</sup>       | high                  | high            | low                     | high                 | low                   | low             | low                     |
| CELEBI 2008 <sup>16</sup>       | high                  | high            | low                     | low                  | moderate              | moderate        | low                     |
| CHAKRAVATI 2015 <sup>17</sup>   | high                  | high            | moderate                | high                 | low                   | low             | low                     |
| CHANG H 2017 <sup>18</sup>      | high                  | low             | moderate                | low                  | low                   | low             | moderate                |
| CHANG WY 2013 <sup>19</sup>     | high                  | high            | low                     | low                  | moderate              | moderate        | low                     |
| CHANG WY 2015 <sup>20</sup>     | high                  | high            | low                     | low                  | moderate              | moderate        | low                     |
| CHOU 2017 <sup>21</sup>         | high                  | high            | low                     | low                  | low                   | low             | low                     |
| CODELLA 2016 <sup>22</sup>      | high                  | high            | high                    | low                  | low                   | low             | low                     |
| CODELLA 2018 <sup>23</sup>      | high                  | high            | low                     | low                  | low                   | low             | low                     |
| DEL ROSARIO 2018 <sup>24</sup>  | high                  | high            | low                     | high                 | low                   | low             | low                     |
| DING 2015 <sup>25</sup>         | high                  | high            | moderate                | moderate             | low                   | low             | moderate                |
| DO 2014 <sup>26</sup>           | high                  | high            | moderate                | moderate             | moderate              | low             | moderate                |

|                                               |      |      |          |          |          |          |          |
|-----------------------------------------------|------|------|----------|----------|----------|----------|----------|
| <b>DO 2017<sup>27</sup></b>                   | high | high | low      | low      | low      | low      | low      |
| <b>DREISEITL 2009<sup>28</sup></b>            | low  | low  | low      | high     | low      | low      | low      |
| <b>ESTEVA 2017<sup>29</sup></b>               | high | low  | low      | low      | low      | low      | low      |
| <b>FERRI 2010<sup>30</sup></b>                | high | low  | low      | low      | low      | low      | low      |
| <b>FINK 2016<sup>31</sup></b>                 | high | low  | high     | high     | low      | low      | low      |
| <b>FORNACIALI 2016<sup>32</sup></b>           | high | high | low      | low      | low      | low      | low      |
| <b>FORSCHNER 2018<sup>33</sup></b>            | high | low  | low      | low      | moderate | moderate | low      |
| <b>FRIEDMAN 2008<sup>34</sup></b>             | high | low  | low      | low      | moderate | moderate | low      |
| <b>GAREAU 2017<sup>35</sup></b>               | high | high | low      | high     | low      | low      | low      |
| <b>GARNAVI 2012<sup>36</sup></b>              | high | high | high     | moderate | low      | low      | moderate |
| <b>GAUTAM 2018<sup>37</sup></b>               | high | high | moderate | moderate | low      | low      | low      |
| <b>GILMORE 2009<sup>38</sup></b>              | high | high | high     | low      | low      | low      | low      |
| <b>GILMORE 2010<sup>39</sup></b>              | high | high | low      | low      | low      | low      | low      |
| <b>GILMORE 2018<sup>40</sup></b>              | high | high | low      | low      | low      | low      | low      |
| <b>GONZALEZ DIAZ 2017<sup>41</sup></b>        | high | low  | low      | low      | low      | low      | low      |
| <b>GOYAL 2018<sup>42</sup></b>                | high | low  | low      | low      | moderate | moderate | low      |
| <b>GUO S 2017<sup>43</sup></b>                | high | low  | low      | low      | low      | low      | low      |
| <b>GUO Y 2018<sup>44</sup></b>                | high | low  | low      | low      | moderate | moderate | low      |
| <b>HAENSSLE 2018<sup>45</sup></b>             | high | low  | low      | low      | low      | low      | low      |
| <b>HAIDER 2014<sup>46</sup></b>               | high | high | low      | low      | low      | low      | low      |
| <b>HARANGI 2017<sup>47</sup></b>              | high | low  | low      | low      | low      | low      | low      |
| <b>HARANGI 2018<sup>48</sup></b>              | high | high | low      | low      | low      | low      | low      |
| <b>HARDIE 2018<sup>49</sup></b>               | high | high | low      | low      | moderate | moderate | low      |
| <b>HAR-SHAI 2005<sup>50</sup></b>             | low  | low  | low      | high     | low      | low      | low      |
| <b>HAUSCHILD 2014<sup>51</sup></b>            | high | low  | low      | low      | moderate | moderate | low      |
| <b>HUNGER 2012<sup>52</sup></b>               | low  | low  | low      | low      | low      | low      | low      |
| <b>JAWOREK-KORJAKOWSKA 2016A<sup>53</sup></b> | high | high | low      | low      | low      | low      | low      |
| <b>JAWOREK-KORJAKOWSKA 2016B<sup>54</sup></b> | high | high | low      | low      | low      | low      | low      |
| <b>JIJI 2017<sup>55</sup></b>                 | high | low  | low      | low      | low      | low      | low      |
| <b>KAUR 2015<sup>56</sup></b>                 | high | high | low      | low      | low      | low      | low      |

|                                            |      |      |          |          |          |          |     |
|--------------------------------------------|------|------|----------|----------|----------|----------|-----|
| <b>KAWAHARA 2018<sup>57</sup></b>          | high | high | moderate | low      | moderate | moderate | low |
| <b>KHAN 2018<sup>58</sup></b>              | high | high | moderate | moderate | low      | low      | low |
| <b>KITADA 2018<sup>59</sup></b>            | high | low  | low      | low      | moderate | moderate | low |
| <b>KOSTOPOULOS 2017<sup>60</sup></b>       | high | low  | moderate | low      | low      | low      | low |
| <b>LAI 2018<sup>61</sup></b>               | high | high | low      | low      | low      | low      | low |
| <b>LEE 2018<sup>62</sup></b>               | high | low  | low      | low      | moderate | moderate | low |
| <b>LI K 2018<sup>63</sup></b>              | high | high | low      | low      | moderate | moderate | low |
| <b>LI L 2014<sup>64</sup></b>              | high | high | low      | low      | low      | low      | low |
| <b>LI Y 2017<sup>65</sup></b>              | high | low  | low      | low      | low      | low      | low |
| <b>LINGALA 2014<sup>66</sup></b>           | high | high | low      | low      | low      | low      | low |
| <b>LIU 2015<sup>67</sup></b>               | high | low  | high     | low      | low      | low      | low |
| <b>LU 2018<sup>68</sup></b>                | high | high | low      | low      | moderate | moderate | low |
| <b>MAGLIOGIANNIS 2004<sup>69</sup></b>     | high | high | low      | low      | low      | low      | low |
| <b>MAGLIOGIANNIS 2015<sup>70</sup></b>     | high | high | low      | low      | low      | low      | low |
| <b>MAHBOD 2017<sup>71</sup></b>            | high | low  | low      | low      | low      | low      | low |
| <b>MAITNER 2018<sup>72</sup></b>           | high | low  | low      | low      | moderate | moderate | low |
| <b>MALVEHY 2014<sup>73</sup></b>           | low  | low  | low      | low      | moderate | moderate | low |
| <b>MANOUSAKI 2006<sup>74</sup></b>         | high | high | low      | low      | low      | low      | low |
| <b>MARCHETTI 2018<sup>75</sup></b>         | high | high | low      | low      | low      | low      | low |
| <b>MARQUES 2012<sup>76</sup></b>           | high | low  | low      | low      | low      | low      | low |
| <b>MATSUNAGA 2017<sup>77</sup></b>         | high | low  | low      | low      | low      | low      | low |
| <b>MENEGOLA 2016<sup>78</sup></b>          | high | high | low      | low      | low      | low      | low |
| <b>MENEGOLA 2017A<sup>79</sup></b>         | high | high | low      | low      | low      | low      | low |
| <b>MENEGOLA 2017B<sup>80</sup></b>         | high | low  | low      | low      | low      | low      | low |
| <b>MESSADI 2009<sup>81</sup></b>           | high | high | high     | low      | low      | low      | low |
| <b>MIRUNALINI 2017<sup>82</sup></b>        | high | low  | low      | low      | low      | low      | low |
| <b>MOLLERSEN 2015<sup>83</sup></b>         | low  | low  | low      | low      | moderate | moderate | low |
| <b>MONHEIT 2011<sup>84</sup></b>           | high | low  | low      | high     | moderate | moderate | low |
| <b>MUNIA 2017<sup>85</sup></b>             | high | high | moderate | low      | low      | low      | low |
| <b>MURPHREE 2017<sup>86</sup></b>          | high | low  | low      | low      | low      | low      | low |
| <b>NADER VASCONCELOS 2017<sup>87</sup></b> | high | low  | low      | low      | low      | low      | low |

|                                          |      |      |          |          |          |          |          |
|------------------------------------------|------|------|----------|----------|----------|----------|----------|
| <b>NANNI 2018<sup>88</sup></b>           | high | low  | low      | low      | moderate | moderate | low      |
| <b>NASIRI 2018<sup>89</sup></b>          | high | low  | low      | low      | moderate | moderate | low      |
| <b>NASR-ESFAHANI 2016<sup>90</sup></b>   | high | high | moderate | low      | low      | low      | low      |
| <b>NICOLAS 2014<sup>91</sup></b>         | high | high | low      | low      | low      | low      | low      |
| <b>PAL 2018<sup>92</sup></b>             | high | low  | low      | low      | moderate | moderate | low      |
| <b>PATWARDHAN 2005<sup>93</sup></b>      | high | high | low      | low      | low      | low      | low      |
| <b>PELLACANI 2004<sup>94</sup></b>       | high | high | low      | low      | low      | low      | low      |
| <b>PEREZ 2018<sup>95</sup></b>           | high | high | low      | low      | low      | low      | low      |
| <b>PICCOLO 2014<sup>96</sup></b>         | high | low  | low      | low      | low      | low      | low      |
| <b>POLAP 2018<sup>97</sup></b>           | high | high | low      | low      | low      | low      | low      |
| <b>QUINZAN 2013<sup>98</sup></b>         | low  | high | low      | low      | low      | low      | low      |
| <b>RADHAKRISHNAN 2017<sup>99</sup></b>   | high | high | high     | low      | low      | low      | low      |
| <b>RADHAKRISHNAN 2018<sup>100</sup></b>  | high | high | low      | low      | low      | low      | low      |
| <b>RAMEZANI 2014<sup>101</sup></b>       | high | high | moderate | moderate | low      | low      | low      |
| <b>RAY 2018<sup>102</sup></b>            | high | high | low      | low      | moderate | moderate | low      |
| <b>REZVANTALAB 2018<sup>103</sup></b>    | high | high | low      | low      | moderate | moderate | low      |
| <b>ROCHA 2017<sup>104</sup></b>          | low  | low  | low      | low      | low      | low      | low      |
| <b>RUBEGNI 2015<sup>105</sup></b>        | high | high | low      | low      | low      | low      | low      |
| <b>RUIZ 2008<sup>106</sup></b>           | high | high | moderate | moderate | low      | low      | low      |
| <b>SABBAGHI 2018<sup>107</sup></b>       | high | high | low      | low      | low      | low      | low      |
| <b>SATHEESHA 2017<sup>108</sup></b>      | high | high | moderate | low      | low      | low      | low      |
| <b>SBONER 2003<sup>109</sup></b>         | high | high | low      | low      | low      | low      | low      |
| <b>SHAIFIEE 2017<sup>110</sup></b>       | high | low  | low      | low      | moderate | moderate | low      |
| <b>SITU 2008<sup>111</sup></b>           | high | high | moderate | low      | low      | low      | moderate |
| <b>SITU 2010<sup>112</sup></b>           | high | high | moderate | low      | low      | low      | moderate |
| <b>SITU 2011<sup>113</sup></b>           | high | low  | low      | low      | low      | low      | low      |
| <b>STANLEY 2007<sup>114</sup></b>        | high | high | low      | low      | low      | low      | low      |
| <b>STOECKER 2005<sup>115</sup></b>       | high | low  | low      | low      | low      | low      | low      |
| <b>SWANSON 2010<sup>116</sup></b>        | low  | high | low      | low      | low      | low      | low      |
| <b>TEIXEIRA SOUSA 2017<sup>117</sup></b> | high | low  | low      | low      | low      | low      | low      |
| <b>TENENHAUS 2010<sup>118</sup></b>      | high | low  | moderate | high     | low      | low      | low      |

|                                     |      |      |          |          |          |          |     |
|-------------------------------------|------|------|----------|----------|----------|----------|-----|
| <b>TOMATIS 2003</b> <sup>119</sup>  | low  | high | low      | low      | low      | low      | low |
| <b>TOMATIS 2005</b> <sup>120</sup>  | high | low  | low      | low      | low      | low      | low |
| <b>TSCHANDL 2018</b> <sup>121</sup> | high | high | low      | low      | low      | low      | low |
| <b>VALLE 2017</b> <sup>122</sup>    | high | low  | high     | low      | low      | low      | low |
| <b>WADHAWAN 2011</b> <sup>123</sup> | high | low  | high     | low      | low      | low      | low |
| <b>WOLF 2013</b> <sup>124</sup>     | high | low  | low      | low      | low      | low      | low |
| <b>WU 2018</b> <sup>125</sup>       | high | high | low      | low      | moderate | moderate | low |
| <b>YANG 2017</b> <sup>126</sup>     | high | low  | low      | low      | low      | low      | low |
| <b>YAP 2018</b> <sup>127</sup>      | high | high | low      | low      | moderate | moderate | low |
| <b>YI 2018</b> <sup>128</sup>       | high | high | low      | low      | low      | low      | low |
| <b>YU C 2018</b> <sup>129</sup>     | high | high | low      | low      | low      | low      | low |
| <b>YU L 2017</b> <sup>130</sup>     | high | low  | high     | low      | low      | low      | low |
| <b>ZEKOVIC 2014</b> <sup>131</sup>  | high | low  | low      | low      | low      | low      | low |
| <b>ZHOU 2011</b> <sup>132</sup>     | high | high | moderate | moderate | low      | low      | low |

**eTable3: Sensitivity, specificity and covariable effects calculated with two identified outliers (Wolf 2013<sup>124</sup> and Jiji 2017<sup>55</sup>) excluded.**

|                             |                 |             | <b>Summary Estimate<br/>with 95% CI</b> | <b>Univariate<br/>p-value</b> |
|-----------------------------|-----------------|-------------|-----------------------------------------|-------------------------------|
| <b>Overall</b>              |                 | Sensitivity | 0.74 (0.66-0.81)                        |                               |
|                             |                 | Specificity | 0.85 (0.80-0.89)                        |                               |
| <b>Dataset Independence</b> | Independent     | Sensitivity | 0.51 (0.32-0.70)                        |                               |
|                             |                 | Specificity | 0.85 (0.74-0.92)                        |                               |
|                             | Non-Independent | Sensitivity | 0.82 (0.77-0.86)                        | p<0.001                       |
|                             |                 | Specificity | 0.85 (0.80-0.88)                        | p=0.967                       |
| <b>Dataset Public</b>       | Public          | Sensitivity | 0.57 (0.44-0.69)                        |                               |
|                             |                 | Specificity | 0.92 (0.88-0.94)                        |                               |
|                             | Proprietary     | Sensitivity | 0.87 (0.83-0.91)                        | p<0.001                       |
|                             |                 | Specificity | 0.73 (0.64-0.80)                        | p<0.001                       |
| <b>CAD Method</b>           | Computer Vision | Sensitivity | 0.86 (0.82-0.89)                        |                               |
|                             |                 | Specificity | 0.79 (0.71-0.85)                        |                               |
|                             | Deep Learning   | Sensitivity | 0.44 (0.30-0.59)                        | p<0.001*                      |
|                             |                 | Specificity | 0.92 (0.89-0.95)                        | p<0.001*                      |
|                             | Hardware Based  | Sensitivity | 0.86 (0.77-0.92)                        | p=0.899*                      |
|                             |                 | Specificity | 0.70 (0.54-0.82)                        | p=0.352*                      |

\* Compared to Computer Vision

**eFigure.** Risk of Bias, Applicability Concerns, and Methodologic Quality

eFigure A, Summary of bias risk and applicability concern evaluations for studies included in the quantitative analysis (n = 70) using the QUADAS-2 tool.

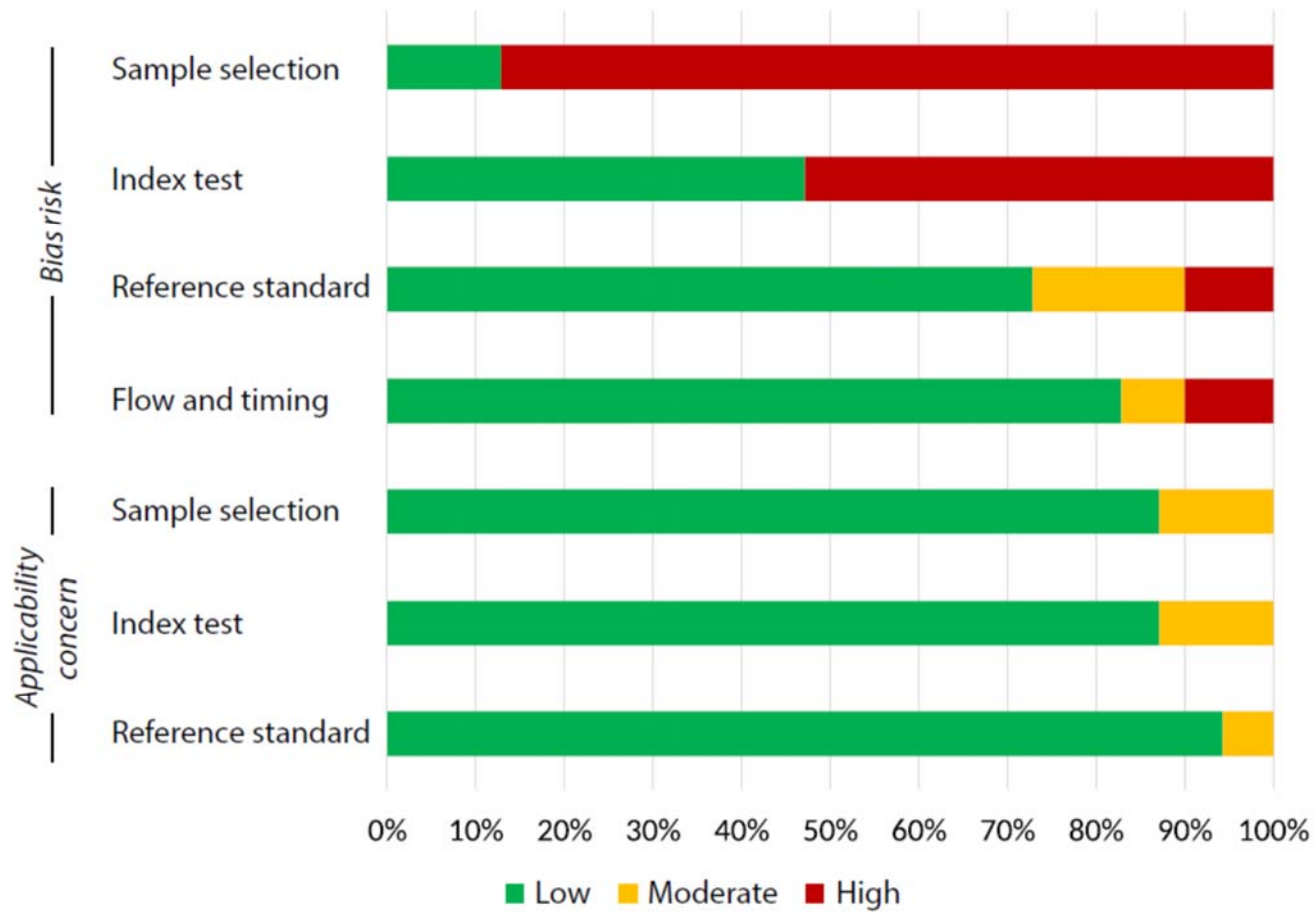

eFigure B, Assessment of the methodologic quality of studies from the medical field (n = 27) using predefined criteria.

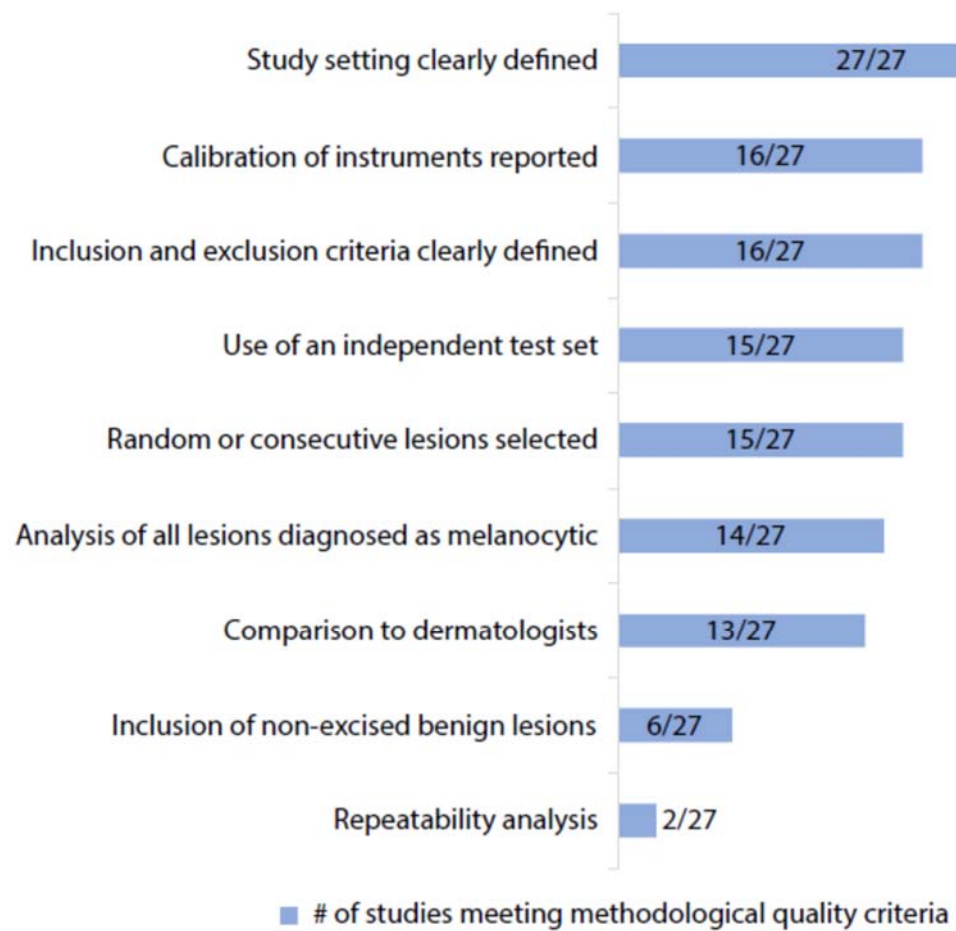



## eReferences

- [1] Abuzagheh O, Barkana B, Faezipour M. Noninvasive real-time automated skin lesion analysis system for melanoma early detection and prevention. *IEEE J Transl Eng Health Med.* 2015; 3:2900310.
- [2] Afifi S, Gholamhosseini H, Sinha R. SVM classifier on chip for melanoma detection. *Conf Proc IEEE Eng Med Biol Soc.* 2017; 270–274. doi:10.1109/embc.2017.8036814.
- [3] Amoabedini A, Saffari M, Saberhani H, Aminian E. Employing the local radon transform for melanoma segmentation in dermoscopic images. *J Med Signals Sens.* 2018;8(3):184–194.
- [4] Ascierto PA, Palla M, Ayala F et al. The role of spectrophotometry in the diagnosis of melanoma, *BMC Dermatol.* 2010;10:5..
- [5] Barata C, Celebi ME, Marques M. A clinically oriented system for melanoma diagnosis using a color representation. *Conf Proc IEEE Eng Med Biol Soc.* 2015. 2015:7462-5. doi: 10.1109/EMBC.2015.7320117
- [6] Barata C, Celebi ME, Marques J. Melanoma detection algorithm based on feature fusion. *Conf Proc IEEE Eng Med Biol Soc.* 2015; 2653–6.doi:10.1109/embc.2015.7318937.
- [7] Barros Mendes D, Correia da Silva N. Skin lesion classification using convolutional neural networks in clinical images. <https://arxiv.org/abs/1812.02316>. 2018.
- [8] Barzegari M, Ghaninezhad H, Mansoori P, Taheri A, Naraghi Z, Asgari M. Computer-aided dermoscopy for diagnosis of melanoma. *BMC Dermatol.* 2005;5(1):8. doi:10.1186/1471-5945-5-8.
- [9] Baur C, Albarqouni S, Navab N. MelanoGANs: High resolution skin lesion synthesis with GANs. <https://arxiv.org/abs/1804.04338>. 2018.
- [10] Bhattacharya A, Young A, Wong A, Stalling S, Wei M, Hadley D. Precision diagnosis of melanoma and other skin lesions from digital images. *AMIA Jt Summits Transl Sci Proc.* 2017; 220–226.
- [11] Bi L, Kim J, Ahn E, Feng DDF. Automatic skin lesion analysis using large-scale dermoscopy images and deep residual networks. <https://arxiv.org/abs/1703.04197>. 2017.
- [12] Bissoto A, Perez F, Ribeiro V, Fornaciali M, Avila S, Valle E. Deep-learning ensembles for skin lesion segmentation, analysis, classification: RECOD titans at ISIC challenge 2018. <https://arxiv.org/abs/1808.08480>. 2018.
- [13] Bono A, Bartoli C, Cascinelli N et al. Melanoma detection. a prospective study comparing diagnosis with the naked eye, dermoscopy and telespectrophotometry. *Dermatology.* 2002;205(4):362–6.
- [14] Carcagni P, Cunna A, Distante C. A dense CNN approach for skin lesion classification. <https://arxiv.org/abs/1807.06416>. 2018.

- [15] Celebi ME, Kingravi HA, Uddin B et al. A methodological approach to the classification of dermoscopy images. *Comput Med Imaging Graph*. 2007;31(6):362–73. doi:10.1016/j.compmedimag.2007.01.003.
- [16] Celebi ME, Iyatomi H, Stoecker WV et al. Automatic detection of blue-white veil and related structures in dermoscopy images. *Comput Med Imaging Graph*. 2008;32(8):670–7. doi:10.1016/j.compmedimag.2008.08.003.
- [17] Chakravati M, Kothari T. A comprehensive study on the applications of machine learning for diagnosis of cancer. <https://arxiv.org/abs/1505.01345>. 2015.
- [18] Chang H. Skin cancer reorganization and classification with deep neural network. <https://arxiv.org/abs/1703.00534>. 2017.
- [19] Chang WY, Huang A, Yang CY et al. Computer-aided diagnosis of skin lesions using conventional digital photography: A reliability and feasibility study. *PLoS ONE*. 2013; 8(11):e76212. doi: 10.1371/journal.pone.0076212.
- [20] Chang WY, Huang A, Chen Y et al. The feasibility of using manual segmentation in a multifeature computer-aided diagnosis system for classification of skin lesions: a retrospective comparative study. *BMJ Open*. 2015; 5(4):e007823. doi: 10.1136/bmjopen-2015-007823.
- [21] Chou C, Shie C, Chang F, Chang J, Chang E. Representation learning in large and small data. <https://arxiv.org/abs/1707.09873>. 2017.
- [22] Codella N, Nguyen QB, Pankanti S et al. Deep learning ensembles for melanoma recognition in dermoscopy images. *IBM J Res Dev*. 2016;64(4). doi:10.1147/jrd.2017.2708299..
- [23] Codella N, Hind M, Ramamurthy KN et al. Teaching meaningful explanations. <https://arxiv.org/abs/1805.11648>. 2018.
- [24] Del Rosario F, Farahi J, Drendel J et al. Performance of a computer-aided digital dermoscopic image analyzer for melanoma detection in 1076 pigmented skin lesion biopsies. *J Am Acad Dermatol*. 2018;78:927–34.
- [25] Ding Y, John N, Smith L, Sun J, Smith M. Combination of 3D skin surface texture features and 2D ABCD features for improved melanoma diagnosis. *Med Bio En Comput*. 2015;53(10):961–74. doi:10.1007/s11517-015-1281-z
- [26] Do T, Zhou Y, Zheng H, Cheung N, Koh D. Early melanoma diagnosis with mobile imaging. *Conf Proc IEEE Eng Med Biol Soc*. 2014;6752–7.
- [27] Do T, Hoang T, Pomponiu V et al. Accessible melanoma detection using smartphones and mobile image analysis. <https://arxiv.org/abs/1711.09553>. 2017.
- [28] Dreiseitl S, Binder M, Hable K, Kittler H. Computer versus human diagnosis of melanoma: evaluation of the feasibility of an automated diagnostic system in a prospective clinical trial. *Melanoma Res*. 2009;19(3):180–4. doi:10.1097/CMR.0b013e32832a1e41.

- [29] Esteva A, Kuprel B, Novoa RA et al. Dermatologist-level classification of skin cancer with deep neural networks. *Nature*. 2017;542(7639):115–118.
- [30] Ferri M, Stanganelli I. Size functions for the morphological analysis of melanocytic lesions. *Int J Biomed Imaging*. 2010;2010:621357. doi:10.1155/2010/6213575.
- [31] Fink C, Jaeger C, Jaeger K, Haenssle H. Diagnostic performance of the MelaFind device in a real-life clinical setting, *J Dtsch Dermatol Ges*. 2017;15(4):414–20.
- [32] Fornaciali M, Carvalho M, Vasques Bittencourt F, Avila S, Valle E. Towards automated melanoma screening: Proper computer vision & reliable results. <https://arxiv.org/abs/1604.04024>. 2016.
- [33] Forschner A, Keim U, Hofmann M et al. Diagnostic accuracy of dermatofluoroscopy in cutaneous melanoma detection: results of a prospective multicentre clinical study in 476 pigmented lesions, *Br J Dermatol*. 2018;179:478–485.
- [34] Friedman R, Gutkowitz-Krusin D, Farber M et al. The diagnostic performance of expert dermoscopists vs a computer-vision system on small-diameter Melanomas. *Arch Dermatol*. 2008;144(4):476–82.
- [35] Gareau D, Correa da Rosa J, Yagerman S et al. Digital imaging biomarkers feed machine learning for melanoma screening. *Exp Dermatol*. 2017;26:615–18.
- [36] Garnavi R, Aldeen M, Bailey J. Computer-aided diagnosis of melanoma using border and wavelet-based texture analysis. *IEEE Trans Inf Technol Biomed*. 2012;16(6):1239–52. doi:10.1109/titb.2012.2212282.
- [37] Gautam D, Ahmed M, Meena Y, Ul Haq A. Machine learning–based diagnosis of melanoma using macro images. *Int J Numer Method Biomed Eng*. 2018;34(5):e2953.
- [38] Gilmore S, Hofmann-Wellenhof R, Muir J, Soyer HP. Lacunarity analysis: A promising method for the automated assessment of melanocytic naevi and melanoma. *PLoS ONE*. 2009;4(10):e7449. doi:10.1371/journal.pone.0007449.
- [39] Gilmore S, Hofmann-Wellenhof R, Soyer HP. A support vector machine for decision support in melanoma recognition. *Exp Dermatol*. 2010;19(9):830–5. doi:10.1111/j.1600-0625.2010.01112.x.
- [40] Gilmore S. Automated decision support in melanocytic lesion management. *PLoS One*. 2018;13(9):e0203459.
- [41] Gonzalez Diaz I. Incorporating the knowledge of dermatologists to convolutional neural networks for the diagnosis of skin lesions. <https://arxiv.org/abs/1703.01976>. 2017.
- [42] Goyal M, Rajapakse J. Deep neural network ensemble by data augmentation and bagging for skin lesion classification. <https://arxiv.org/abs/1807.05496>. 2018.

- [43] Guo S, Luo Y, Song Y. Random forests and VGG-NET: An algorithm for the ISIC 2017 skin lesion classification challenge. <https://arxiv.org/abs/1703.05148>. 2017
- [44] Guo Y, Ashour A. Multiple convolutional neural network for skin dermoscopic image classification. <https://arxiv.org/abs/1807.08114>. 2018.
- [45] Haenssle H, Fink C, Schneiderbauer R et al. Man against machine: diagnostic performance of a deep learning convolutional neural network for dermoscopic melanoma recognition in comparison to 58 dermatologists. *Ann Oncol*. 2018;29(8):1836–1842.
- [46] Haider S, Cho D, Amelard R, Wong A, Clausi DA. Enhanced classification of malignant melanoma lesions via the integration of physiological features from dermatological photographs, *Conf Proc IEEE Eng Med Biol Soc*. 2014;6455–8.
- [47] Harangi B. Skin lesion detection based on an ensemble of deep convolutional neural network. <https://arxiv.org/abs/1705.03360>. 2017.
- [48] Harangi B. Skin lesion classification with ensembles of deep convolutional neural networks. *J Biomed Inform*. 2018;86:25–32.
- [49] Hardie R, Ali R, De Silva M, Kebede T. Skin lesion segmentation and classification for ISIC 2018 using traditional classifiers with hand-crafted features. <https://arxiv.org/abs/1807.07001>. 2018.
- [50] Har-Shai Y, Glickmann Y, Siller G et al. Electrical impedance scanning for melanoma diagnosis: A validation study. *Plast Reconstr Surg*. 2005;116(3):782–90.
- [51] Hauschild A, Chen SC, Weichenthal M et al. To excise or not: Impact of melafind on german dermatologists' decisions to biopsy atypical lesions. *J Dtsch Dermatol Ges*. 2014;12:606–14. doi:10.1111/ddg.12362.
- [52] Hunger RE, Torre Rocco D, Serov A, Hunziker T. Assessment of melanocytic skin lesions with a high-definition laser doppler imaging system. *Skin Res Technol*. 2012;18(2):207–11. doi:10.1111/j.1600-0846.2011.00555.x.
- [53] Jaworek-Korjakowska J, Kleczek P. Automatic classification of specific melanocytic lesions using artificial intelligence. *Biomed Res Int*. 2016; 2016:8934242. doi:10.1155/2016/8934242
- [54] Jaworek-Korjakowska J. Computer-aided diagnosis of micro-malignant melanoma lesions applying support vector machines, *Biomed Res Int*. 2016.
- [55] Jiji G, Raj J. An extensive technique to detect and analyze melanoma: A challenge at the international symposium on biomedical imaging (ISBI) 2017. <https://arxiv.org/abs/1702.08717>. 2017.
- [56] Kaur R, Albano PP, Cole JG et al. Real-time supervised detection of pink areas in dermoscopic images of melanoma: importance of color shades, texture and location. *Skin Res Technol*. 2015;21(4):466–73. doi:10.1111/srt.12216.

- [57] Kawahara J, Daneshvar S, Argenziano G, Hamarneh G. 7-point checklist and skin lesion classification using multi-task multi-modal neural nets. *IEEE J Biomed Health Inform.* 2018;23(2):538-46.
- [58] Khan M, Akram T, Sharif M et al. An implementation of normal distribution based segmentation and entropy controlled features selection for skin lesion detection and classification. *BMC Cancer.* 2018;18(1):638
- [59] Kitada S, Iyatomi H. Skin lesion classification with ensemble of squeeze-and-excitation networks and semi-supervised learning. <https://arxiv.org/abs/1809.02568>. 2018.
- [60] Kostopoulos S, Asvestas P, Kalatzis I et al. Adaptable pattern recognition system for discriminating melanocytic nevi from malignant melanomas using plain photography images from different image databases. *Int J Med Inform.* 2017;105:1-10.
- [61] Lai Z, Deng H. Medical image classification based on deep features extracted by deep model and statistic feature fusion with multilayer perceptron. *Comput Intell Neurosci.* 2018:2061516. doi: 10.1155/2018/2061516
- [62] Lee Y, Jung S, Won H. WonDerM: Skin lesion classification with fine-tuned neural networks. <https://arxiv.org/abs/1808.03426>. 2018.
- [63] Li K, Li E. Skin lesion analysis towards melanoma detection via end-to-end deep learning of convolutional neural networks. <https://arxiv.org/abs/1807.08332>. 2018.
- [64] Li L, Zhang Q, Ding Y, Jiang H, Thiers BH, Wang JZ. Automatic diagnosis of melanoma using machine learning methods on a spectroscopic system. *BMC Med Imaging.* 2014;14:36. doi:10.1186/1471-2342-14-36.
- [65] Li Y, Shen L. Skin lesion analysis towards melanoma detection using deep learning network. *Sensors (Basel).* 2018;18(2):556.
- [66] Lingala M, Stanley RJ, Rader RK et al. Fuzzy logic color detection: Blue areas in melanoma dermoscopy images. *Comput Med Imaging Graph.* 2014;38(5):403–410. doi:10.1016/j.compmedimag.2014.03.007.
- [67] Liu Z, Zerubia J. Skin image illumination modeling and chromophore identification for melanoma diagnosis. *Phys Med Biol.* 2015;60(9):3415–31.
- [68] Lu Y, Xu P. Anomaly detection for skin disease images using variational autoencoder. <https://arxiv.org/abs/1807.01349>. 2018.
- [69] Maglogiannis IG, Zafiropoulos EP. Characterization of digital medical images utilizing support vector machines. *BMC Med Inform Decis Mak.* 2004;4:4. doi:10.1186/1472-6947-4-4.

- [70] Magliogiannis I, Delibasis K. Enhancing classification accuracy utilizing globules and dots features in digital dermoscopy. *Comput Methods Programs Biomed.* 2014;118(2):124–33.
- [71] Mahbod A, Ecker R, Ellinger I. Skin lesion classification using hybrid deep neural networks. <https://arxiv.org/abs/1702.08434>. 2017
- [72] Majtner T, Bajic B, Yildirim S, Hardeberg J, Lindblad J, Sladjoe N. Ensemble of convolutional neural networks for dermoscopic images classification. <https://arxiv.org/abs/1808.05071>. 2018.
- [73] Malveyh J, Hauschild A, Curiel-Lewandrowski C et al. Clinical performance of the Nevisense system in cutaneous melanoma detection: an international, multicentre, prospective and blinded clinical trial on efficacy and safety, *Br J Dermatol.* 2014;171(5):1099–107
- [74] Manousaki AG, Manios AG, Tsompanaki EI et al. A simple digital image processing system to aid in melanoma diagnosis in an everyday melanocytic skin lesion unit: a preliminary report, *Int J Dermatol.* 2006;45(4):402–10. doi:10.1111/j.1365-4632.2006.02726.x.
- [75] Marchetti M, Codella N, Dusza S et al. Results of the 2016 international skin imaging collaboration international symposium on biomedical imaging challenge: Comparison of the accuracy of computer algorithms to dermatologists for the diagnosis of melanoma from dermoscopic images. *J Am Acad Dermatol.* 2018;78(2):270–7.
- [76] Marques J, Barata C, Mendonca T. On the role of texture and color in the classification of dermoscopy images. *Conf Proc IEEE Eng Med Biol Soc.* 2012; 4402–5. doi:10.1109/embc.2012.6346942.
- [77] Matsunaga K, Hamada A, Minagawa A, Koga H. Image classification of melanoma, nevus and seborrheic keratosis by deep neural network ensemble. <https://arxiv.org/abs/1703.03108>. 2017.
- [78] Menegola A, Fornaciali M, Pires R, Avila S, Valle E. Towards automated melanoma screening: Exploring transfer learning schemes. <https://arxiv.org/abs/1609.01228>. 2016.
- [79] Menegola A, Fornaciali M, Pires R, Vasques Bittencourt F, Avila S, Valle E. Knowledge transfer for melanoma screening with deep learning. <https://arxiv.org/abs/1703.07479>. 2017.

- [80] Menegola A, Tavares J, Fornaciali M, Li L, Avila S, Valle E. RECOD titans at ISIC challenge 2017. <https://arxiv.org/abs/1703.04819>. 2017
- [81] Messadi M, Bessaid A, Taleb-ahmed A. Extraction of specific parameters for skin tumour classification. *J Med Eng Technol*. 2009;33(4):288–95. doi:10.1080/03091900802451315.
- [82] Mirunalini P, Chandrabose A, Gokul V, Jaisakthi S. Deep learning for skin lesion classification. <https://arxiv.org/abs/1703.04364>. 2017.
- [83] Møllersen K, Kirchesch H, Zortea M, Schopf TR, Hindberg K, Godtliebsen F. Computer-aided decision support for melanoma detection applied on melanocytic and nonmelanocytic skin lesions: A comparison of two systems based on automatic analysis of dermoscopic images, *BioMed Res Int*. 2015; 2015:579282. doi: 10.1155/2015/579282
- [84] Monheit G, Cagnetta AB, Ferris L et al. The performance of melafind a prospective multicenter study, *Arch Dermatol*. 2011;147:188–94. doi:10.1001/archdermatol.2010.302.
- [85] Munia T, Alam M, Neubert J, Fazel-Rezai R. Automatic diagnosis of melanoma using linear and nonlinear features from digital image. *Conf Proc IEEE Eng Med Biol Soc* 2017. 2017;4281–4284.
- [86] Murphree DH, Ngufor C. Transfer learning for melanoma detection: Participation in ISIC 2017 skin lesion classification challenge. <https://arxiv.org/abs/1703.05235>. 2017.
- [87] Nader Vasconcelos C, Nader Vasconcelos B. Convolutional neural network committees for melanoma classification with classical and expert knowledge based image transforms data augmentation. <https://arxiv.org/abs/1702.07025>. 2017
- [88] Nanni L, Lumini A, Ghidoni S. Ensemble of deep learned features for melanoma classification. <https://arxiv.org/abs/1807.08008>. 2018.
- [89] Nasiri S, Jung M, Helsper J, Fathi M. Deep-CLASS at ISIC machine learning challenge 2018. <https://arxiv.org/abs/1807.08993>. 2018.
- [90] Nasr-Esfahani E, Samavi S, Karimi N et al. Melanoma detection by analysis of clinical images using convolutional neural network. *Conf Proc IEEE Eng Med Biol Soc*. 2016; 1373–1376.
- [91] Nicolas R, Fornells A, Golobardes E, Corral G, Puig S, Malveyh J. Derma: A melanoma diagnosis platform based on collaborative multilabel analog reasoning, *ScientificWorldJournal*. 2014:351518. doi: 10.1155/2014/351518.
- [92] Pal A, Ray S, Garain U. Skin disease identification from dermoscopy images using deep convolutional neural network. <https://arxiv.org/abs/1807.09163>. 2018.

- [93] Patwardhan S, Dai S, Dhawan A. Multi-spectral image analysis and classification of melanoma using fuzzy membership based partitions. *Comput Med Imaging Graph*. 2005;29:287–96.
- [94] Pellacani G, Grana C, Cucchiara R. Automated extraction and description of dark areas in surface microscopy melanocytic lesion images. *Dermatology*. 2004;208(1):21–26.
- [95] Perez F, Vasconcelos C, Avila S, Valle E. Data augmentation for skin lesion analysis. <https://arxiv.org/abs/1809.01442>. 2018.
- [96] Piccolo D, Crisman G, Schoinas S, Altamura D, Peris K. Computer-automated ABCD versus dermatologists with different degrees of experience in dermoscopy. *Eur J Dermatol*. 2014;24(4):477–81.
- [97] Polap D, Winnicka A, Serwata K, Kesik K, Wozniak M. An intelligent system for monitoring skin diseases, *Sensors (Basel)*. 2018;18(8):2552.
- [98] Quinzan I, Sotoca JM, Latorre-Carmona P, Pla F, Garcia-Sevilla P, Boldo E. Band selection in spectral imaging for non-invasive melanoma diagnosis. *Biomed Opt Express*. 2013;4(4):514–9. doi:10.1364/boe.4.000514.
- [99] Radhakrishnan A, Durham C, Soylemezoglu A, Uhler C. Patchnet: Interpretable neural networks for image classification. <https://arxiv.org/abs/1705.08078>. 2017.
- [100] Radhakrishnan A, Durham C, Soylemezoglu A, Uhler C. Patchnet: Context-restricted architectures to provide visual features for image classification. <https://arxiv.org/pdf/1705.08078.pdf>. 2018.
- [101] Ramezani M, Karimian A, Moallem P. Automatic detection of malignant melanoma using macroscopic images. *J Med Signals Sens*. 2014;4(4):281–90.
- [102] Ray S. Disease classification within dermoscopic images using features extracted by ResNet50 and classification through deepforest. <https://arxiv.org/abs/1807.05711>. 2018.
- [103] Rezvantalab A, Safigholi H, Karimijeshni S. Dermatologist level dermoscopy skin cancer classification using different deep learning convolutional neural networks algorithms. <https://arxiv.org/abs/1810.10348>. 2018.



- [104] Rocha L, Menzies SW, Loet S et al. Analysis of an electrical impedance spectroscopy system in short-term digital dermoscopy imaging of melanocytic lesions, *Br J Dermatol*. 2017;177(5):1432–1438. doi:10.1111/bjd.15595.
- [105] Rubegni P, Feci L, Nami N et al. Computer-assisted melanoma diagnosis: a new integrated system. *Melanoma Res*. 2015;25(6):537–42.
- [106] Ruiz D, Berenguer V, Soriano A, Martin J. A cooperative approach for the diagnosis of the melanoma. *Conf Proc IEEE Eng Med Biol Soc*. 2008;2008:5144-7. doi:10.1109/IEMBS.2008.4650372.
- [107] Sabbaghi S, Aldeen M, Stoecker W, Garnavi R. Biologically inspired quadtree colour detection in dermoscopy images of melanoma. *IEEE J Biomed Health Inform*. 2018;23(2):570-7.
- [108] Satheesha TY, Satyanarayana D, Prasad MNG, Dhruve KD. Melanoma is skin deep: A 3D reconstruction technique for computerized dermoscopic skin lesion classification. *IEEE J Transl Eng Health Med*. 2017;5:4300117. doi:10.1109/jtehm.2017.2648797.
- [109] Sboner A, Eccher C, Blanzieri E et al. A multiple classifier system for early melanoma diagnosis. *Artif Intell Med*. 2003;27(1):29–44.
- [110] Shafiee MJ, Wong A. Discovery radiomics via deep multi-column radiomic sequences for skin cancer detection. <https://arxiv.org/abs/1709.08248>. 2017.
- [111] Situ N, Yuan X, Chen J, Zouridakis G. Malignant melanoma detection by bag-of-features classification. *Conf Proc IEEE Eng Med Biol Soc* 2008. 2008;3110–3. doi:10.1109/iembs.2008.4649862.
- [112] Situ N, Wadhawan T, Yuan X, Zouridakis G. Modeling spatial relation in skin lesion images by the graph walk kernel. *Conf Proc IEEE Eng Med Biol Soc* 2010. 2010;6130–3. doi:10.1109/iembs.2010.5627798.
- [113] Situ N, Yuan X, Zouridakis G. Assisting main task learning by heterogenous auxiliary tasks with applications to skin cancer screening. *Conf Proc Artificial Intelligence and Statistics*. 2011;688–97.
- [114] Stanley RJ, Stoecker WV, Moss RH. A relative color approach to color discrimination for malignant melanoma detection in dermoscopy images. *Skin Res Technol*. 2007;13(1):62–72. doi:10.1111/j.1600-0846.2007.00192.x.
- [115] Stoecker WV, Gupta K, Stanley RJ, Moss RH, Shrestha B. Detection of asymmetric blotches (asymmetric structureless areas) in dermoscopy images of malignant melanoma using relative color. *Skin Res Technol*. 2005;11(3):179–84. doi:10.1111/j.1600-0846.2005.00117.x.

- [116] Swanson DL, Laman SD, Biryulina M et al. Optical transfer diagnosis of pigmented lesions. *Dermatol Surg*. 2010;36(12):1979–86. doi:10.1111/j.1524-4725.2010.01808.x.
- [117] Teixeira Sousa R, Vasconcellos de Moraes L. Araguaia medical vision lab at ISIC 2017 skin lesion classification challenge. <https://arxiv.org/abs/1703.00856>. 2017.
- [118] Tenenhaus A, Nkengne A, Horn JF, Serruys C, Giron A, Fertil B. Detection of melanoma from dermoscopic images of naevi acquired under uncontrolled conditions. *Skin Res Technol*. 2010;16(1):85–97. doi:10.1111/j.1600-0846.2009.00385.x.
- [119] Tomatis S, Carrara M, Bono A et al. Automated melanoma detection: multispectral imaging and neural network approach for classification. *Med Phys*. 2003;30(2):212–21. doi:10.1088/0031-9155/50/8/004.
- [120] Tomatis S, Carrara M, Bono A et al. Automated melanoma detection with a novel multispectral imaging system: results of a prospective study. *Phys Med Biol*. 2005;50(8):1675–87. doi:10.1118/1.1538230.
- [121] Tschandi P, Argenziano G, Razmara M, Yap J. Diagnostic accuracy of content-based dermoscopic image retrieval with deep classification features. *British Journal of Dermatology*. 2018. doi: 10.1111/bjd.17189.
- [122] Valle E, Fornaciali M, Menegola A et al. Data, depth, and design: Learning reliable models for melanoma screening. *IEEE J Biomed Health Inform*. 2017;20(10).
- [123] Wadhawan T, Situ N, Rui H, Lancaster K, Yuan X, Zouridakis G. Implementation of the 7-point checklist for melanoma detection on smart handheld devices. *Conf Proc IEEE Eng Med Biol Soc* 2011. 2011;3180–3. doi:10.1109/iembs.2011.6090866.
- [124] Wolf JA, Moreau JF, Akilov O et al. Diagnostic inaccuracy of smartphone applications for melanoma detection. *JAMA Dermatol*. 2013;149(4):422–6. doi:<https://dx.doi.org/10.1001/jamadermatol.2013.2382>.
- [125] Wu J, Li X, Chen E, Jiang H, Dong X, Rong R. What evidence does deep learning model use to classify skin lesions? <https://arxiv.org/abs/1811.01051>. 2018.

- [126] Yang X, Zeng Z, Yeo SY, Tan C, Tey HL, Su Y. A novel multi-task deep learning model for skin lesion segmentation and classification. <https://arxiv.org/abs/1703.01025>. 2017.
- [127] Yap J, Yolland W, Tschandl P. Multimodal skin lesion classification using deep learning. *Exp Dermatol*. 2018;27(11):1261-1267. doi: 10.1111/exd.13777
- [128] Yi X, Walia E, Babyn P. Unsupervised and semi-supervised learning with categorical generative adversarial networks assisted by wasserstein distance for dermoscopy image classification. <https://arxiv.org/abs/1804.03700>. 2018.
- [129] Yu C, Yang S, Kim W et al. Acral melanoma detection using a convolutional neural network for dermoscopy images. *PLoS One*. 2018;13(3):e0193321.
- [130] Yu L, Chen H, Dou Q, Qin J, Heng PA. Automated melanoma recognition in dermoscopy images via very deep residual networks. *IEEE Trans Med Imaging*. 2017;36(4):994–1004. doi:10.1109/tmi.2016.2642839.
- [131] Zekovic I, Dramicanin T, Lenhardt L, Bandic J, Dramicanin MD. Discrimination among melanoma, nevi, and normal skin by using synchronous luminescence spectroscopy. *Appl Spectrosc*. 2014;68(8):823–830.
- [132] Zhou Y, Smith M, Smith L, Farooq A, Warr R. Enhanced 3d curvature pattern and melanoma diagnosis. *Comput Med Imaging Graph*. 2011;35(2):155-65.
